# Supplementary material for: Influence of deposition order of dual active components on the NH3-SCO performance of the bimetallic Pt–V system supported on TiO2
Source: Royal Society of Chemistry journal article supplement (doi:10.1039/d3nj01886e), 2023-01-01
Supplement: d3nj01886e1.pdf [file d3nj01886e1.pdf]

1

## ***Supplementary Information***

2

3 **Influence of Deposition Order of Dual Active Components on NH<sub>3</sub>-SCO**  
4 **performance of Bimetallic Pt-V System Supported on TiO<sub>2</sub>**

5 Yu Gao<sup>a</sup>, Zhitao Han<sup>a,b\*</sup>, Shijian Lu<sup>c</sup>, Xinxiang Pan<sup>a,b,d</sup>

6

7 *a. Marine Engineering College, Dalian Maritime University, 116026, Dalian 116024, China*

8 *b. Liaoning Research Center for Marine Internal Combustion Engine Energy-Saving, Dalian*  
9 *116024, China*

10 *c. Low Carbon Energy Institute, China University of Mining and Technology, Xuzhou 221008, PR*  
11 *China*

12 *d. School of Electronic and Information Technology, Guangdong Ocean University, Zhanjiang,*  
13 *Guangdong 524088, China*

14

15 **Corresponding author:**

16 Zhitao Han (E-mail: [hantz@dlmu.edu.cn](mailto:hantz@dlmu.edu.cn))

17

## *Contents*

|    |                                                                                               |    |
|----|-----------------------------------------------------------------------------------------------|----|
| 19 | Section S1. Catalyst preparation .....                                                        | 3  |
| 20 | Section S2. Catalyst characterization .....                                                   | 4  |
| 21 | Section S3. The changes of NO <sub>x</sub> concentration during the activity test of prepared |    |
| 22 | catalysts .....                                                                               | 7  |
| 23 | Section S4. The comparison of NH <sub>3</sub> -SCO performance of catalysts .....             | 10 |
| 24 | Section S5. The results of H <sub>2</sub> O resistance test .....                             | 13 |
| 25 | Section S6. The results of activity stability test .....                                      | 14 |
| 26 | Section S7. HRTEM results .....                                                               | 15 |
| 27 | Section S8. EDS mapping results .....                                                         | 19 |
| 28 | Section S9. N <sub>2</sub> adsorption and desorption and XPS data .....                       | 19 |
| 29 | References .....                                                                              | 21 |
| 30 |                                                                                               |    |
| 31 |                                                                                               |    |

## 32 Section S1. Catalyst preparation

### 33 • $V_{0.5}/TiO_2$ catalyst

34  $V_{0.5}/TiO_2$  catalyst with 0.5 wt.% V was synthesized via wet impregnation method.<sup>21</sup>  
35 Firstly, 0.554 g  $C_2H_2O_4 \cdot 2H_2O$  (AR, 99.9 % purity, Sinopharm Chemical Reagent  
36 Co.Ltd.) and 0.026 g  $NH_4VO_3$  (AR, 99.95 % purity, Sinopharm Chemical Reagent  
37 Co.Ltd.) were dissolved in 10 ml deionized water to prepare V precursor solution.  
38 Then, 2 g  $TiO_2$  powder (P25, Degussa, contains 79 wt.% anatase and 21 wt.% rutile)  
39 was added to above solution, followed by stirring vigorously for 2 h at room  
40 temperature. After that, the obtained suspension solution was initially dehydrated by  
41 rotary evaporation, and further dried at 120 °C for 6 h. Finally, the obtained solid was  
42 calcined at 500 °C for 3 h.

### 43 • $Pt_{0.04}V_{0.5}/TiO_2$ catalyst

44 The prepared method of  $Pt_{0.04}V_{0.5}/TiO_2$  catalyst was similar to that of  $V_{0.5}/TiO_2$   
45 catalyst, except that 10 ml of diluted  $Pt(NO_3)_2$  solution (AR, 18.02 wt. % Pt, Aladdin  
46 Reagent Co.Ltd.) was added to V precursor solution before the addition of  $TiO_2$   
47 powder.

### 48 • $Pt_{0.04}/V_{0.5}/TiO_2$ catalyst

49  $Pt_{0.04}/V_{0.5}/TiO_2$  catalyst was prepared by impregnating  $V_{0.5}/TiO_2$  catalyst in diluted  
50  $Pt(NO_3)_2$  solution. Firstly, 2 g  $V_{0.5}/TiO_2$  catalyst was added to 10 ml diluted  $Pt(NO_3)_2$   
51 solution, followed by stirring vigorously for 2 h at room temperature. Subsequently,  
52 the obtained suspension solution was dehydrated by rotary evaporation, and further  
53 dried at 120 °C for 6 h. Finally, the obtained solid was calcined at 500 °C for 3 h.

54

## 55 Section S2. Catalyst characterization

56 The textural properties of catalysts were evaluated by using a physisorption  
57 instrument (ASAP 2020 Plus, Micromeritics) at liquid nitrogen temperature (-196 °C).

58 The specific surface areas of catalysts were calculated by the N<sub>2</sub> adsorption-  
59 desorption isotherm using Brunauer-Emmett-Teller (BET) equation. The average pore  
60 diameter, pore volume and pore size distribution were calculated by the N<sub>2</sub> desorption  
61 isotherm using Barrett-Joyner-Halenda (BJH) model.

62 The X-ray diffraction (XRD) test of catalysts were carried out on an X-ray diffraction  
63 meter (Empyrean, PANalytical) using Cu K $\alpha$  ( $\lambda=0.154$  nm) as radiation source. The  
64 XRD diffractograms of catalysts were recorded in the  $2\theta$  range of 20-80 ° with a  
65 scanning interval of 0.02 °.

66 X-ray photoelectron spectra (XPS) of catalysts were measured by using a  
67 photoelectron spectrometer (AXIS-ULTRA DLD-600W, Shimadzu) with Al K $\alpha$  as  
68 radiation source. The binding energies of different elements were calibrated by C 1s  
69 peak at 284.6 eV.

70 Transmission electron microscopy (TEM) images of catalysts were measured on a  
71 JEM-2100F electron microscope (JEOL, Japan). The acceleration voltage was 200  
72 kV, and the surface chemical analysis was conducted by using energy dispersive X-  
73 ray spectrometer (EDS).

74 The Raman spectra of prepared catalysts were performed at a Raman Spectrometer  
75 (Jobin-Yvon LabRAM HR800), using an Ar ion laser (514.5 nm) as the excitation  
76 source.

77 H<sub>2</sub>-temperature programmed reduction (H<sub>2</sub>-TPR), NH<sub>3</sub>-temperature programmed  
78 desorption (NH<sub>3</sub>-TPD) and oxygen programmed desorption (O<sub>2</sub>-TPD) were conducted  
79 on a chemisorption analyzer (Autochem II 2920, Micromeritics). Before each H<sub>2</sub>-TPR

80 test, sample was flushed in He stream (50 mL/min) at 300 °C for 30 min, and then  
81 cooled down to 50 °C. The reduction reaction was proceed from 100 to 800 °C with a  
82 heating rate of 10 °C/min. A mixture gas flow (50 mL/min) of 5 % H<sub>2</sub> and 95 % Ar  
83 was used as reducing gas [19].

84 For NH<sub>3</sub>-TPD experiments, each sample was pretreated in He stream (50 mL/min) for  
85 30 min at 200 °C, and saturated with NH<sub>3</sub> at 50 °C for 1 h. Then, the sample was  
86 treated by He stream at 50 °C for 1 h to eliminate physically absorbed NH<sub>3</sub>. Finally,  
87 the sample was heated from 100 to 800 °C at a ramping rate of 10 °C/min in He  
88 stream (50 mL/min) and NH<sub>3</sub>-TPD data were recorded in the meantime. During NH<sub>3</sub>-  
89 TPD experiments, the signals of reaction products N<sub>2</sub> (m/e = 28), N<sub>2</sub>O (m/e = 44), NO  
90 (m/e = 30), NO<sub>2</sub> (m/e = 46) and H<sub>2</sub> (m/e = 2) were recorded by using a quadrupole  
91 mass spectrometer (QMS).

92 For O<sub>2</sub>-TPD experiments, each sample was pretreated in He stream (50 mL/min) for  
93 30 min at 200 °C, and saturated with O<sub>2</sub> at 50 °C for 1 h. Then, the sample was treated  
94 by He stream at 50 °C for 1 h. Finally, the sample was heated from 100 to 900 °C at a  
95 ramping rate of 10 °C/min in He stream (50 mL/min) and O<sub>2</sub>-TPD data were recorded  
96 at the same time.

97 The in-situ DRIFTS measurements were carried out on a FT-IR spectrometer (iS50,  
98 Thermo Fisher Scientific) equipped with a reaction cell with KBr window (Praying  
99 Mantis, Harrick) and a program temperature controller. Typically, samples were  
100 pretreated in N<sub>2</sub> flow at 200 °C for 30 min, and then heated to specified temperature to  
101 record the background spectra. Subsequently, in-situ DRIFTS spectra were recorded  
102 after the reaction gas was introduced into reaction cell.

103 The processes of in-situ DRIFTS test using NH<sub>3</sub> as probe to characterize acid sites on  
104 the surface of prepared catalysts were as follows: Firstly, catalysts were flushed by N<sub>2</sub>

105 (100 mL/min) at 200 °C. Then catalysts were pre-adsorbed with 5000 ppm of NH<sub>3</sub>  
106 (100 mL/min) for 30 min for saturation, and purged with N<sub>2</sub> (100 mL/min) for 30 min  
107 to eliminate physically adsorbed NH<sub>3</sub>. Next, the IR spectra of NH<sub>3</sub> adsorption on the  
108 surface of prepared catalysts were recorded.<sup>21</sup>

109 The in-situ DRIFTS experimental processes of reaction between O<sub>2</sub> and pre-adsorbed  
110 NH<sub>3</sub> were as follows: Firstly, catalysts were flushed by N<sub>2</sub> (100 mL/min) at 200 °C.  
111 Then catalysts were pre-adsorbed with 5000 ppm of NH<sub>3</sub> (100 mL/min) for 30 min for  
112 saturation, and purged with N<sub>2</sub> (100 mL/min) for 30 min to eliminate physically  
113 adsorbed NH<sub>3</sub>. Next, 10 % O<sub>2</sub> (100 mL/min) were introduced into the reactor, and the  
114 IR spectra were recorded as a function of time.<sup>21</sup>

115 The in-situ DRIFTS experimental processes of reaction between NH<sub>3</sub> and pre-  
116 adsorbed O<sub>2</sub> were as follows: Firstly, catalysts were flushed by N<sub>2</sub> (100 mL/min) at  
117 200 °C. Then catalysts were pre-adsorbed with 10 % O<sub>2</sub> (100 mL/min) for 30 min for  
118 saturation, and purged with N<sub>2</sub> (100 mL/min) for 30 min to eliminate physically  
119 adsorbed O<sub>2</sub>. Next, 5000 ppm NH<sub>3</sub> (100 mL/min) were introduced into the reactor.  
120 Then, the IR spectra were recorded as a function of time.<sup>21</sup>

121

122 Section S3. The changes of  $\text{NO}_x$  concentration during the activity test of  
123 prepared catalysts.

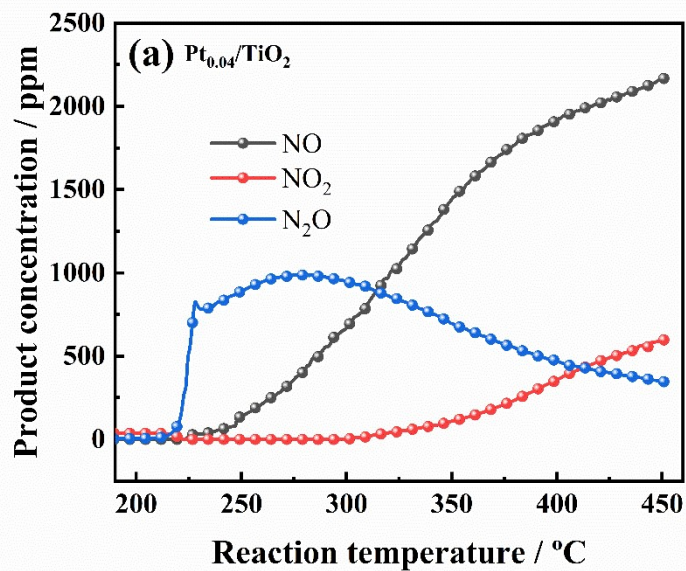

124

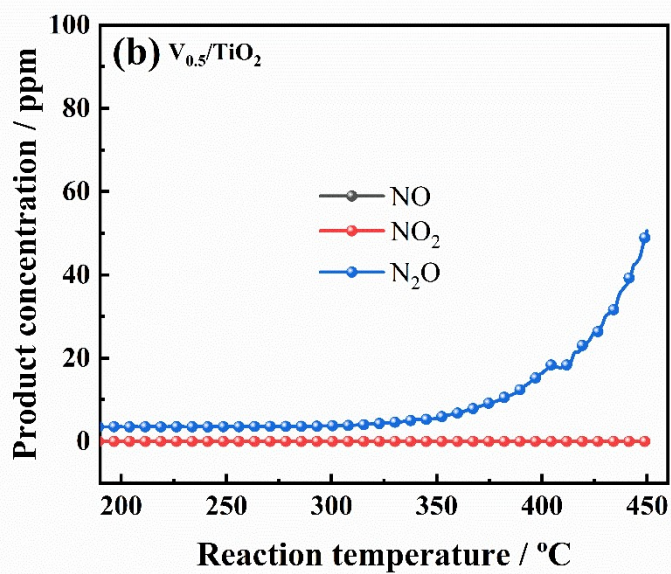

125

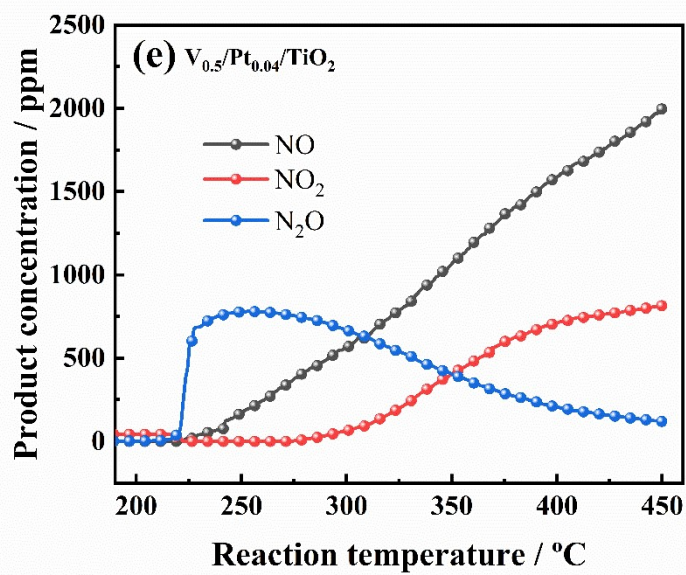

126

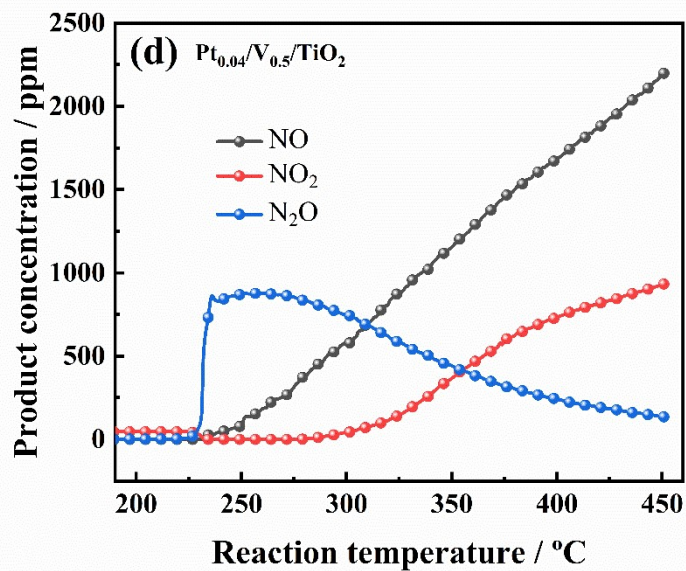

127



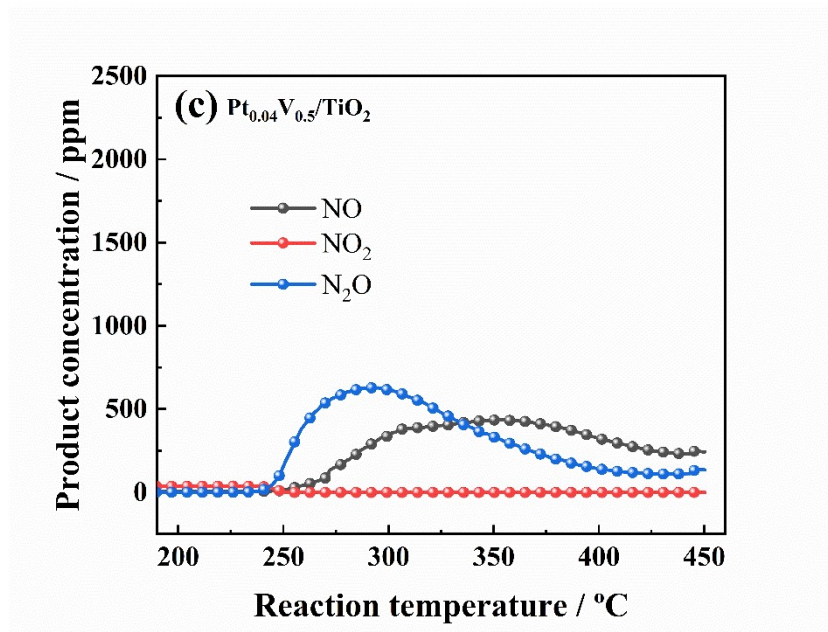

128

129

130

131 Fig. S1. The changes of  $\text{NO}_x$  concentration during the activity test of (a)  $\text{Pt}_{0.04}/\text{TiO}_2$ ,

132 (b)  $\text{V}_{0.5}/\text{TiO}_2$ , (c)  $\text{V}_{0.5}/\text{Pt}_{0.04}/\text{TiO}_2$ , (d)  $\text{Pt}_{0.04}/\text{V}_{0.5}/\text{TiO}_2$ , (e)  $\text{Pt}_{0.04}\text{V}_{0.5}/\text{TiO}_2$  catalysts.

133

134 **Section S4. The comparison of NH<sub>3</sub>-SCO performance of catalysts**

135 The comparison of NH<sub>3</sub>-SCO performance of catalysts in previous work and

136 V<sub>0.5</sub>/Pt<sub>0.04</sub>/TiO<sub>2</sub> catalyst in this work was shown in Table S1. T<sub>100</sub> represents the

137 corresponding reaction temperature when NH<sub>3</sub> removal efficiency was 100 %.

138 Table S1. The comparison of catalysts in previous work and V<sub>0.5</sub>/Pt<sub>0.04</sub>/TiO<sub>2</sub> catalyst

139 in this work.

| Catalyst                                                                    | Synthesis process   | Experimental conditions                                                                                                           | T <sub>100</sub> (°C) | N <sub>2</sub> selectivity at T <sub>100</sub> (%) | Ref.             |
|-----------------------------------------------------------------------------|---------------------|-----------------------------------------------------------------------------------------------------------------------------------|-----------------------|----------------------------------------------------|------------------|
| <b>V<sub>0.5</sub>/Pt<sub>0.04</sub>/TiO<sub>2</sub><br/>(0.04 wt.% Pt)</b> | <b>Impregnation</b> | <b>NH<sub>3</sub> : 5000 ppm<br/>O<sub>2</sub> : 10 vol. %<br/>N<sub>2</sub> as balance gas<br/>GHSV : 75,000 h<sup>-1</sup></b>  | <b>225</b>            | <b>80.2%</b>                                       | <b>This work</b> |
| Pt/TiO <sub>2</sub><br>(0.1 wt.% Pt)                                        | impregnation        | NH <sub>3</sub> : 2000 ppm<br>O <sub>2</sub> : 8 vol. %<br>N <sub>2</sub> as balance gas<br>GHSV : 60,000 h <sup>-1</sup>         | 275                   | 48                                                 | 1                |
| PtVW/TiO <sub>2</sub><br>(0.1 wt.% Pt)                                      | impregnation        | NH <sub>3</sub> : 200 ppm<br>O <sub>2</sub> : 5 vol. %<br>N <sub>2</sub> as balance gas<br>GHSV : 100,000 h <sup>-1</sup>         | 250                   | 50                                                 | 2                |
| Pt-WO <sub>3</sub> /ZrO <sub>2</sub><br>(1.5 wt.% Pt)                       | Impregnation        | [NH <sub>3</sub> ] = 180 ppm,<br>[O <sub>2</sub> ] = 8 vol. %, N <sub>2</sub><br>as balance gas<br>GHSV = 100,000 h <sup>-1</sup> | 300                   | 58                                                 | 3                |
| PtCu/ZSM-5<br>(1.5 wt.% Pt)                                                 | Impregnation        | [NH <sub>3</sub> ] = 180 ppm,<br>[O <sub>2</sub> ] = 8 vol. %, N <sub>2</sub><br>as balance gas<br>GHSV = 100,000 h <sup>-1</sup> | 275                   | 72                                                 | 4                |

|                                                                                                |                                |                                                                                                                                   |     |    |    |
|------------------------------------------------------------------------------------------------|--------------------------------|-----------------------------------------------------------------------------------------------------------------------------------|-----|----|----|
| Pt/Al <sub>2</sub> O <sub>3</sub><br>(0.46% wt.% Pt)                                           | Impregnation                   | [NH <sub>3</sub> ] = 500 ppm,<br>[O <sub>2</sub> ] = 5 vol. %, N <sub>2</sub><br>as balance gas<br>GHSV = 66,000 h <sup>-1</sup>  | 250 | 50 | 5  |
| Pt/CeZrO <sub>2</sub><br>(1 wt.% Pt)                                                           | Impregnation                   | [NH <sub>3</sub> ] = 200 ppm,<br>[O <sub>2</sub> ] = 8 vol. %, N <sub>2</sub><br>as balance gas<br>GHSV = 100,000 h <sup>-1</sup> | 330 | 42 | 6  |
| Pt-ZSM-5<br>(2.55 wt.% Pt)                                                                     | Ion-exchange                   | [NH <sub>3</sub> ] = 1000 ppm,<br>[O <sub>2</sub> ] = 4 vol. %, N <sub>2</sub><br>as balance gas<br>GHSV = 50,000 h <sup>-1</sup> | 200 | 71 | 7  |
| V <sub>2</sub> O <sub>5</sub> /TiO <sub>2</sub><br>(2 wt.% V <sub>2</sub> O <sub>5</sub> )     | Mortar mixing<br>of<br>powders | [NH <sub>3</sub> ] = 800 ppm,<br>[O <sub>2</sub> ] = 3 vol. %, Ar<br>as balance gas<br>GHSV = 60,000 h <sup>-1</sup>              | 250 | 82 | 8  |
| V <sub>2</sub> O <sub>5</sub> /CeO <sub>2</sub> /TiO <sub>2</sub><br>(10 wt.% Ce, 2<br>wt.% V) | Wet<br>impregnation            | [NH <sub>3</sub> ] = 200 ppm,<br>[O <sub>2</sub> ] = 8 vol. %, N <sub>2</sub><br>as balance gas<br>GHSV = 60,000 h <sup>-1</sup>  | 300 | 90 | 9  |
| Ag/nano-Al <sub>2</sub> O <sub>3</sub>                                                         | Impregnation                   | [NH <sub>3</sub> ] = 500 ppm,<br>[O <sub>2</sub> ] = 10 vol. %, N <sub>2</sub><br>as balance gas<br>GHSV = 28,000 h <sup>-1</sup> | 140 | 71 | 10 |
| Ag/Al <sub>2</sub> O <sub>3</sub><br>(H <sub>2</sub> reduced)                                  | Incipient wet<br>impregnation  | [NH <sub>3</sub> ] = 500 ppm,<br>[O <sub>2</sub> ] = 10 vol. %, Ar<br>as balance gas<br>GHSV = 28,000 h <sup>-1</sup>             | 180 | 83 | 11 |

|                                                                 |                                   |                                                                                                                                    |     |    |    |
|-----------------------------------------------------------------|-----------------------------------|------------------------------------------------------------------------------------------------------------------------------------|-----|----|----|
| Ag/SiO <sub>2</sub> -TiO <sub>2</sub><br>(10 wt.% Ag)           | Impregnation                      | [NH <sub>3</sub> ] = 500 ppm,<br>[O <sub>2</sub> ] = 10 vol. %, N <sub>2</sub><br>as balance gas<br>GHSV = 28,000 h <sup>-1</sup>  | 200 | 63 | 12 |
| Ag/ZSM-5                                                        | Rotary<br>evaporator              | [NH <sub>3</sub> ] = 1000 ppm,<br>[O <sub>2</sub> ] = 10 vol. %, N <sub>2</sub><br>as balance gas<br>GHSV = 35,000 h <sup>-1</sup> | 135 | 75 | 13 |
| CuO/Al <sub>2</sub> O <sub>3</sub><br>(10 wt.% Cu)              | Wet<br>impregnation               | [NH <sub>3</sub> ] = 1000 ppm,<br>[O <sub>2</sub> ] = 10 vol. %, N <sub>2</sub><br>as balance gas<br>GHSV = 50,000 h <sup>-1</sup> | 350 | 93 | 14 |
| CuO-Fe <sub>2</sub> O <sub>3</sub><br>(molar Cu:Fe =<br>1:1)    | Sol-gel                           | [NH <sub>3</sub> ] = 800 ppm,<br>[O <sub>2</sub> ] = 3 vol. %, N <sub>2</sub><br>as balance gas<br>GHSV = 90,000 h <sup>-1</sup>   | 250 | 91 | 15 |
| Fe <sub>2</sub> O <sub>3</sub> -TiO <sub>2</sub><br>(5 wt.% Fe) | One-step sol-<br>gel              | [NH <sub>3</sub> ] = 1000 ppm,<br>[O <sub>2</sub> ] = 3 vol. %, N <sub>2</sub><br>as balance gas<br>GHSV = 200,000 h <sup>-1</sup> | 400 | 91 | 16 |
| Mn <sub>2</sub> O <sub>3</sub>                                  | Thermal<br>decomposition          | [NH <sub>3</sub> ] = 500 ppm,<br>[O <sub>2</sub> ] = 3 vol. %, He<br>as balance<br>GHSV = 20,000 h <sup>-1</sup>                   | 210 | 60 | 17 |
| MnO <sub>2</sub>                                                | Pelletized at<br>high<br>pressure | [NH <sub>3</sub> ] = 500 ppm,<br>[O <sub>2</sub> ] = 3 vol. %, N <sub>2</sub><br>as balance<br>GHSV = 20,000 h <sup>-1</sup>       | 200 | 65 | 18 |

140

141

142 **Section S5. The results of H<sub>2</sub>O resistance test**

143 H<sub>2</sub>O resistance test of V<sub>0.5</sub>/Pt<sub>0.04</sub>/TiO<sub>2</sub> catalyst was performed at 225 °C, and the  
144 results were shown in Fig. S2. As shown in Fig. S2, after the injection of 10 vol.%  
145 H<sub>2</sub>O vapor, the NH<sub>3</sub> conversion efficiency of V<sub>0.5</sub>/Pt<sub>0.04</sub>/TiO<sub>2</sub> catalyst slightly  
146 decreased from 100 % to ~97.7 %, and the N<sub>2</sub> selectivity changed little. When H<sub>2</sub>O  
147 vapor was cut off, the NH<sub>3</sub> conversion efficiency returned to 100 % rapidly, and the  
148 N<sub>2</sub> selectivity did not change obviously. This indicated that V<sub>0.5</sub>/Pt<sub>0.04</sub>/TiO<sub>2</sub> catalyst  
149 possessed good H<sub>2</sub>O resistance, and the slight deactivation of V<sub>0.5</sub>/Pt<sub>0.04</sub>/TiO<sub>2</sub> catalyst  
150 caused by H<sub>2</sub>O introduction was reversible.

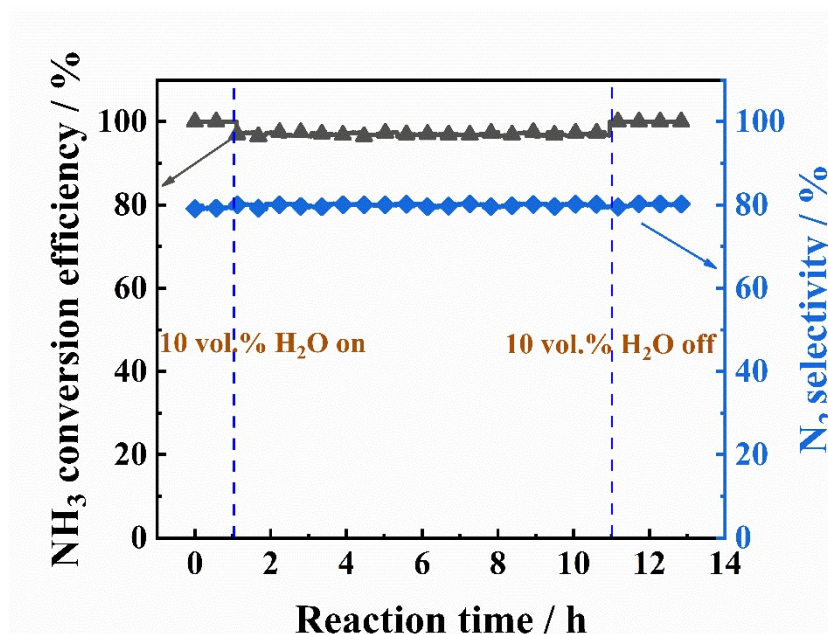

151

152 Fig. S2. H<sub>2</sub>O resistance test results of V<sub>0.5</sub>/Pt<sub>0.04</sub>/TiO<sub>2</sub> catalyst at 225 °C.

153

154 **Section S6. The results of activity stability test**

155 Aiming to test the activity stability of  $V_{0.5}/Pt_{0.04}/TiO_2$  catalyst, a 20-hour stability test  
156 was carried out, and the results were shown in Fig. S3. It could be seen that during 20  
157 hours of test, the  $NH_3$  conversion and  $N_2$  selectivity of  $V_{0.5}/Pt_{0.04}/TiO_2$  catalyst were  
158 maintained at  $\sim 100\%$  and  $\sim 80\%$ , respectively. It indicated that  $V_{0.5}/Pt_{0.04}/TiO_2$   
159 catalyst possessed good stability.

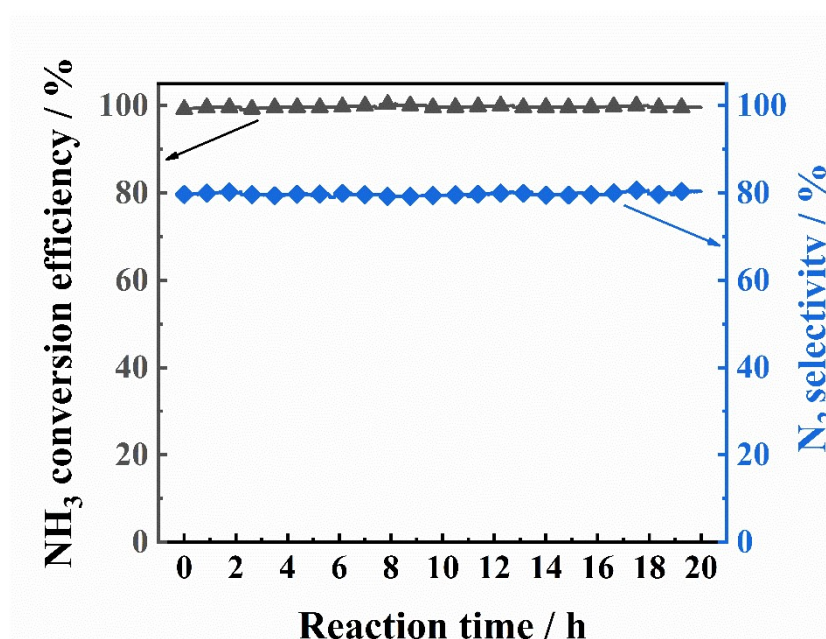

160

161 Fig. S3. Stability test results of  $V_{0.5}/Pt_{0.04}/TiO_2$  catalyst at 225 °C.

162 Section S7. HRTEM results

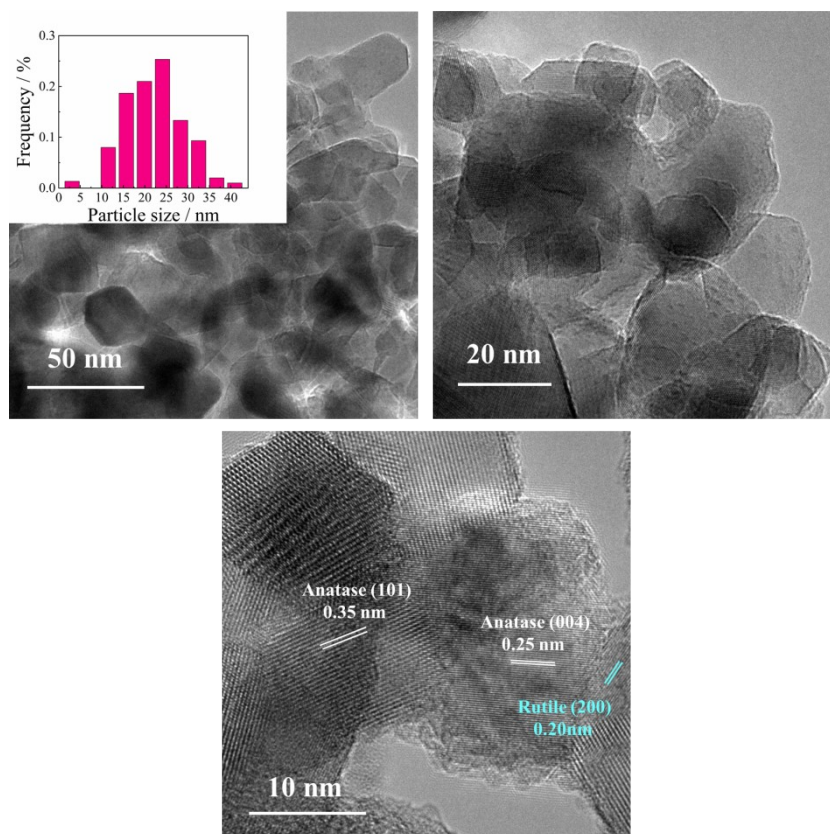

163  
164

Fig. S4. HRTEM images of Pt<sub>0.04</sub>/TiO<sub>2</sub> catalyst.

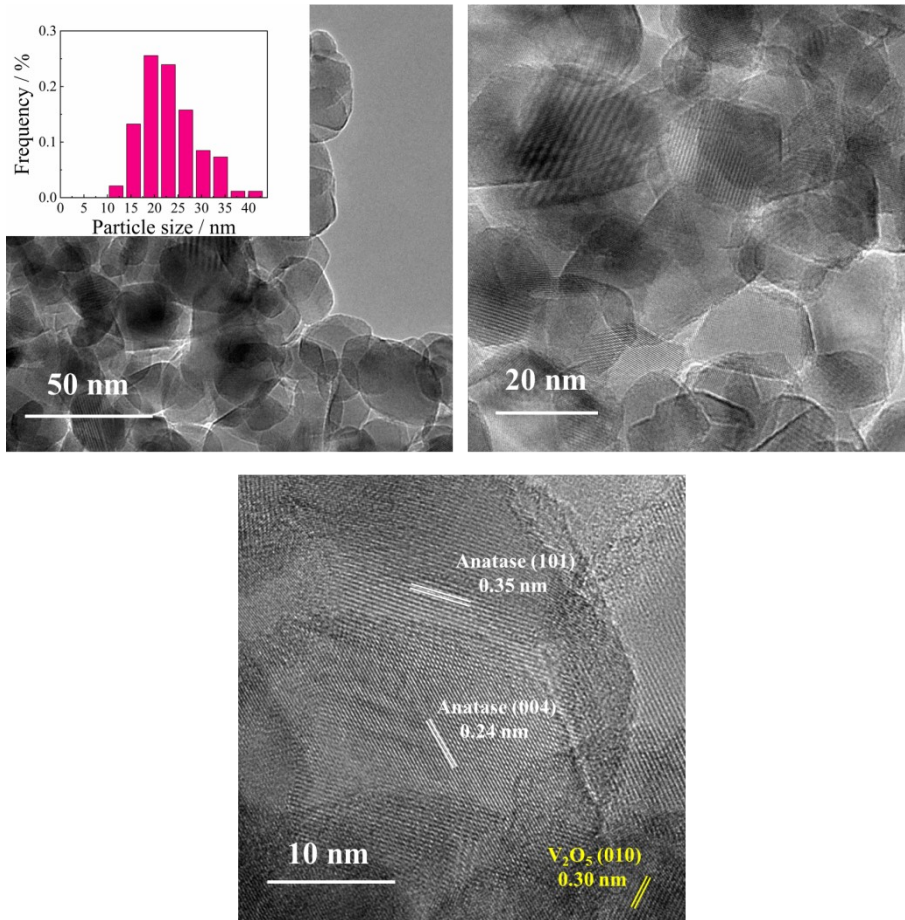

165

166

Fig. S5. HRTEM images of  $V_{0.5}/TiO_2$  catalyst.



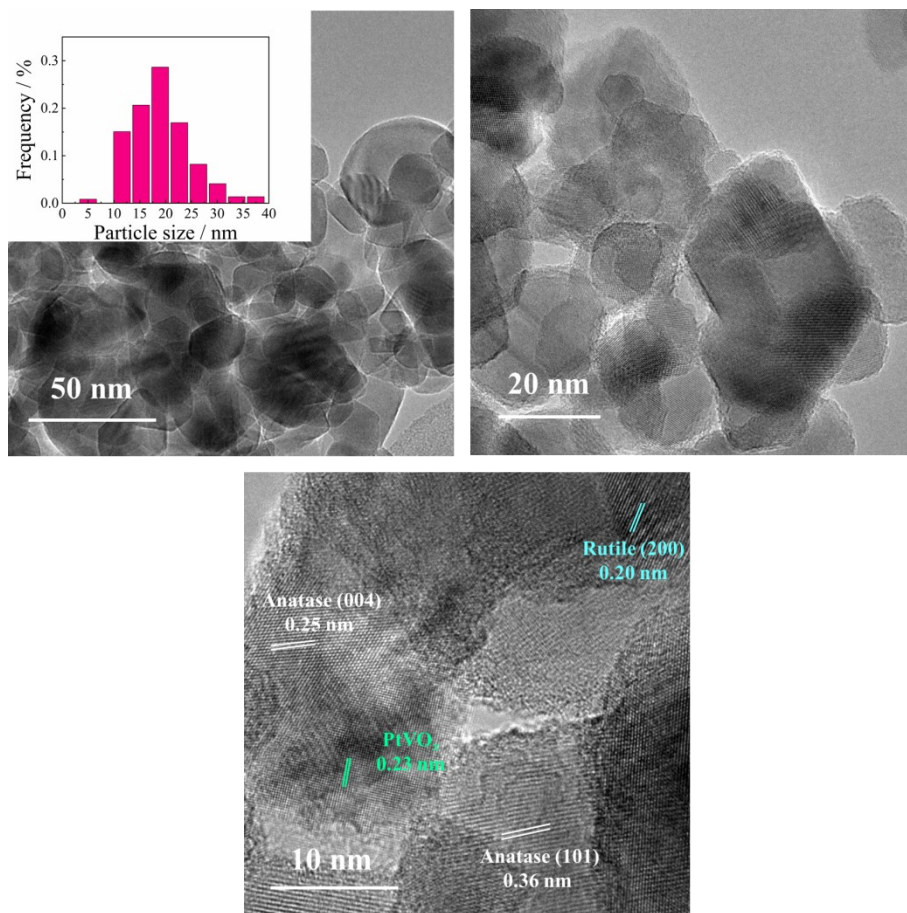

167

168

Fig. S6. HRTEM images of  $\text{Pt}_{0.04}\text{V}_{0.5}/\text{TiO}_2$  catalyst.

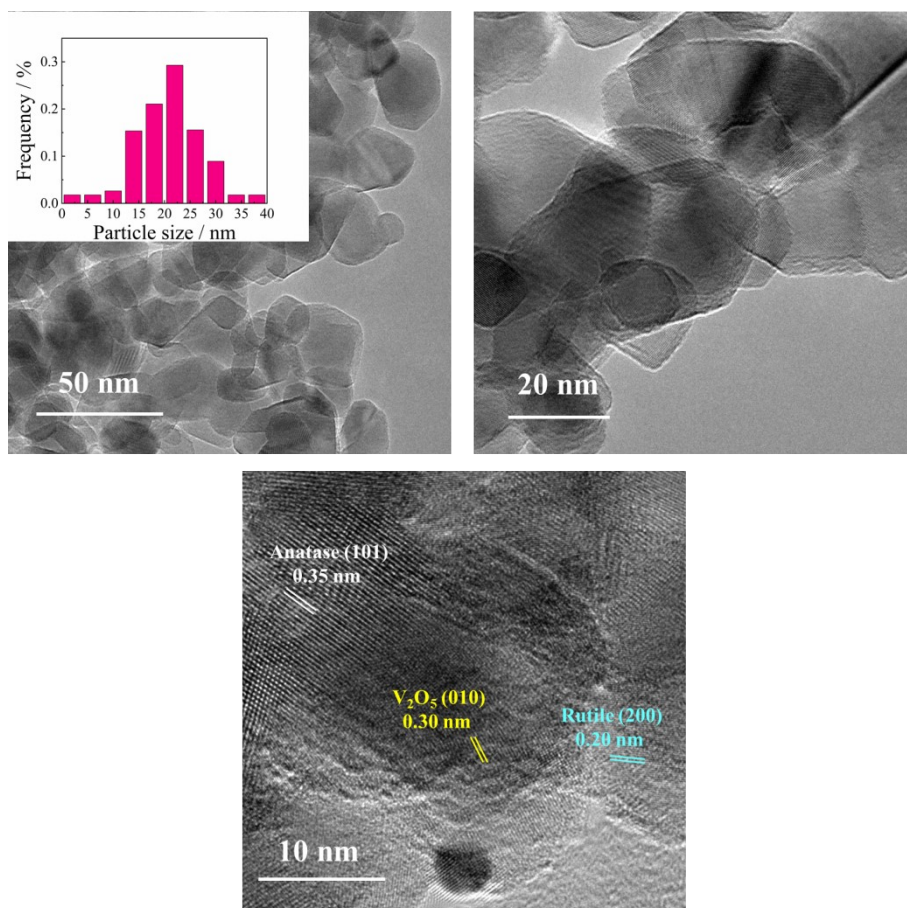

169

170

Fig. S7. HRTEM images of  $\text{Pt}_{0.04}/\text{V}_{0.5}/\text{TiO}_2$  catalyst.

171 **Section S8. EDS mapping results**

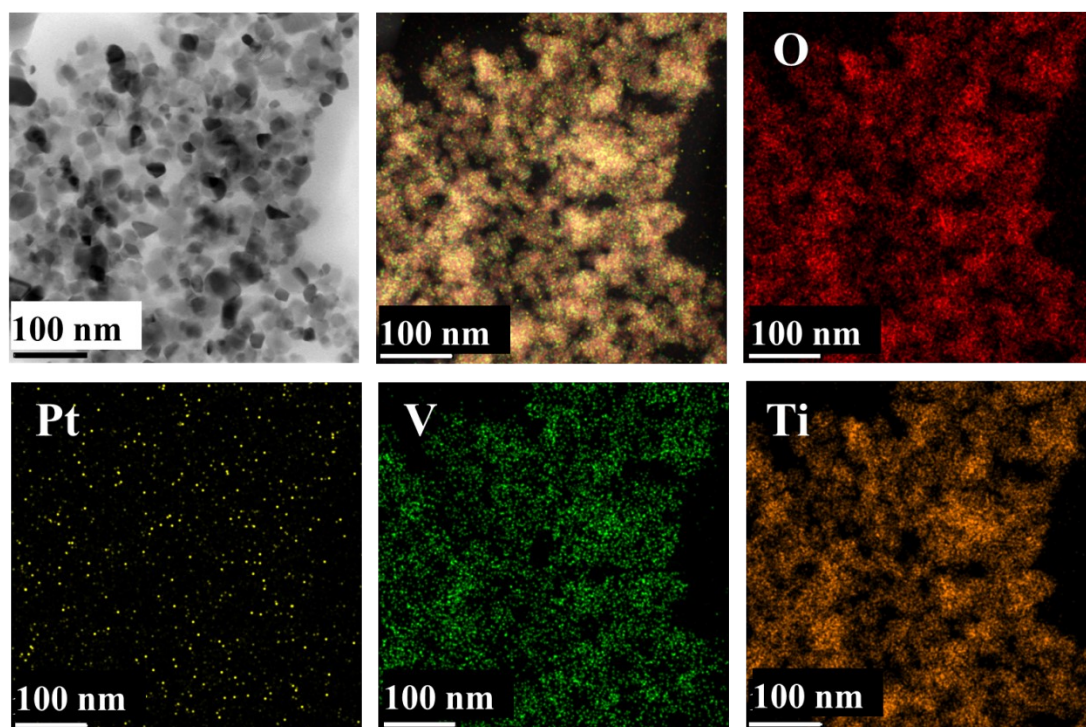

172  
173

Fig. S8. EDS mappings of  $\text{Pt}_{0.04}/\text{V}_{0.5}/\text{TiO}_2$  catalyst.

174 **Section S9.  $\text{N}_2$  adsorption and desorption and XPS data**

175 Table S2. Specific surface areas and average pore sizes of prepared catalysts.

| Sample                                         | $S_{\text{BET}}$ ( $\text{m}^2/\text{g}$ ) | Pore volume ( $\text{cm}^3/\text{g}$ ) | Pore diameter (nm) |
|------------------------------------------------|--------------------------------------------|----------------------------------------|--------------------|
| $\text{Pt}_{0.04}/\text{TiO}_2$                | 52.21                                      | 0.32                                   | 21.38              |
| $\text{V}_{0.5}/\text{TiO}_2$                  | 57.16                                      | 0.41                                   | 25.40              |
| $\text{V}_{0.5}/\text{Pt}_{0.04}/\text{TiO}_2$ | 50.36                                      | 0.33                                   | 23.72              |
| $\text{Pt}_{0.04}/\text{V}_{0.5}/\text{TiO}_2$ | 50.60                                      | 0.33                                   | 22.75              |
| $\text{Pt}_{0.04}\text{V}_{0.5}/\text{TiO}_2$  | 49.81                                      | 0.34                                   | 23.32              |

183  
184

Table S3. XPS results of prepared catalysts

| Sample                                                 | Pt<br>(%) | V<br>(%) | O<br>(%) | $V^{3+}/V^{3+}+V^{4+}+V^{5+}$<br>(%) | $V^{4+}/V^{3+}+V^{4+}+V^{5+}$<br>(%) | $O_{\alpha}/O_{\alpha}+O_{\beta}$<br>(%) | $Pt^0/Pt^0+Pt^{2+}+Pt^{4+}$<br>(%) | $Pt^{2+}/Pt^0+Pt^{2+}+Pt^{4+}$<br>(%) | $Pt^{4+}/Pt^0+Pt^{2+}+Pt^{4+}$<br>(%) |
|--------------------------------------------------------|-----------|----------|----------|--------------------------------------|--------------------------------------|------------------------------------------|------------------------------------|---------------------------------------|---------------------------------------|
| Pt <sub>0.04</sub> /TiO <sub>2</sub>                   | 0.16      | -        | 66.60    | -                                    | -                                    | 13.28                                    | 39.97                              | 27.20                                 | 32.83                                 |
| V <sub>0.5</sub> /TiO <sub>2</sub>                     | -         | 17.91    | 55.55    | 28.87                                | 44.26                                | 16.62                                    | -                                  |                                       |                                       |
| V <sub>0.5</sub> /Pt <sub>0.04</sub> /TiO <sub>2</sub> | 0.10      | 1.25     | 66.60    | 38.75                                | 28.88                                | 20.73                                    | 35.56                              | 33.13                                 | 31.31                                 |
| Pt <sub>0.04</sub> /V <sub>0.5</sub> /TiO <sub>2</sub> | 0.15      | 1.20     | 66.75    | 24.50                                | 40.60                                | 20.09                                    | 16.22                              | 67.35                                 | 16.43                                 |
| Pt <sub>0.04</sub> V <sub>0.5</sub> /TiO <sub>2</sub>  | 0.12      | 1.15     | 66.03    | 28.72                                | 38.98                                | 19.22                                    | 17.42                              | 60.25                                 | 22.33                                 |

## References

- 1 G. J. Kim, D. W. Kwon, J. H. Shin, K. W. Kim and S. C. Hong, *Environ. Technol.*, 2018, **40**, 2588-2600.
- 2 S. W. Byun, S. J. Lee, M. Kim, W. B. Bae, H. Shin, M. J. Hazlett, D. Kang, B. Tesfaye, P. W. Park and S. B. Kang, *Chem. Eng. J.*, 2022, **444**, 136517.
- 3 M. Sun, S. Wang, Y. Li, H. Xu and Y. Chen, *Appl. Surf. Sci.*, 2017, **402**, 323-329.
- 4 M. Sun, S. Wang, Y. Li, Q. Wang, H. Xu and Y. Chen, *Taiwan Inst. Chem. E.*, 2017, **78**, 401-408.
- 5 S. Shrestha, M. P. Harold, K. Kamasamudram, and A. Yezerets, *Catal. Today*, 2014, **231**, 105-115.
- 6 M. Sun, J. Liu, C. Song, Y. Ogata, H. Rao, X. Zhao, H. Xu and Y. Chen, *ACS Appl. Mater. Inter.*, 2019, **11**, 23102-23111.
- 7 Y. Li and J. N. Armor, *Appl. Catal. B-Environ.*, 1997, **13**, 131-139.
- 8 D.W. Kwon, S.M. Lee and S.C. Hong, *Appl. Catal. A*, 2015, **505**, 557-565.
- 9 S. M. Lee and S. C. Hong, *Appl. Catal. B-Environ.*, 2015, **163**, 30-39.
- 10 F. Wang, J. Ma, G. He, M. Chen, C. Zhang and H. He, *ACS Catal.*, 2018, **8**, 2670-2682.
- 11 F. Wang, G. He, B. Zhang, M. Chen, X. Chen, C. Zhang and H. He, *ACS Catal.*, 2019, **9**, 1437-1445.
- 12 F. Wang, J. Ma, G. He, M. Chen, S. Wang, C. Zhang and H. He, *Ind. Eng. Chem. Res.*, 2018, **57**, 11903-11910.
- 13 Z. Wang, Q. Sun, D. Wang, Z. Hong, Z. Qu and X. Li, *Sep. Purif. Technol.*, 2019, **209**, 1016-1026.
- 14 L. Gang, J. Van Grondelle, B. G. Anderson and R. A. Van Santen, *J. Catal.*, 1999, **186**, 100-109.

- 15 Q. Zhang, H. Wang, P. Ning, Z. Song, X. Liu and Y. Duan, *Appl. Surf. Sci.*, 2017, **419**, 733-743.
- 16 R. Q. Long and R. T. Yang, *J. Catal.*, 2002, **207**, 158-165.
- 17 J. Y. Lee, S. B. Kim and S. C. Hong, *Chemosphere* 2003, **50**, 1115-1122.
- 18 Z. Qu, R. Fan, Z. Wang, H. Wang and L. Miao, *Appl. Surf. Sci.*, 2015, **351**, 573-579.
